# Supplementary material for: Do Breast Cancer Cell Lines Provide a Relevant Model of the Patient Tumor Methylome?
Source: PLoS One. 2014 Aug 26;9(8):e105545. doi: 10.1371/journal.pone.0105545 (PMC4144876; doi:10.1371/journal.pone.0105545)
Supplement: Table S1 — Molecular characteristics of cell lines. ER, PR and HER2 status for each cell line, as measured by IHC and FISH, expression and methylation subtypes, predicted B-CIMP status and predicted ER status using the Fackler methylation markers are recorded for each cell line. (XLS) [file pone.0105545.s006.xls]

Cell Line	ER	PR	HER2	Expression Subtype	B-CIMP	Fackler Predicted ER	Dedeurwaeder Subtype
BT549	0	0	0	BaB	1	1	1
MCF7	1	1	0	Lu	1	1	4
600M	1	0	0	Lu	1	1	4
BT20	0	0	0	BaA	1	1	1
HCC1500	0	0	0	BaA	0	0	3
HCC3153	0	0	0	BaA	0	0	3
BT474	1	1	1	Lu	1	1	4
HCC1428	1	1	0	Lu	1	1	4
CAMA1	1	0	0	Lu	1	1	4
MDAMB134	1	0	0	Lu	1	1	4
HCC2185	0	0	0	Lu	0	0	2
HBL100	0	0	0	BaB	1	1	3
HCC1395	0	0	0	BaB	0	0	3
HCC202	0	0	1	Lu	1	1	4
HS578T	0	0	0	BaB	0	0	6
AU565	0	0	1	Lu	1	0	1
HCC38	0	0	0	BaB	0	0	3
UACC893	0	NA	1	Lu	1	0	4
HCC1143	0	0	0	BaA	0	0	3
LY2	1	0	0	Lu	1	0	4
HCC1599	0	NA	0	BaA	0	0	3
DU4475	0	NA	0	NA	1	0	1
HCC1187	0	0	0	BaA	0	0	3
HCC1937	0	0	0	BaA	0	0	3
MDAMB453	0	0	1	Lu	1	1	4
HCC70	0	0	0	BaA	0	0	2
HCC1954	0	0	1	BaA	1	0	4
HCC1806	0	0	0	NA	0	0	3
MDAMB415	1	0	0	Lu	1	1	5
T47D	1	1	0	Lu	1	1	4
MDAMB231	0	0	0	BaB	1	1	4
MCF12A	0	0	0	BaA	0	1	2
HCC2218	0	NA	1	Lu	1	1	4
ZR7530	1	0	1	Lu	1	0	4
SKBR3	0	0	1	Lu	0	0	4
ZR751	1	0	0	Lu	1	0	4
HCC1419	1	NA	1	Lu	1	1	4
UACC812	1	0	1	Lu	1	0	4
MCF10A	0	0	0	BaB	1	1	1
MDAMB436	0	0	0	BaB	0	0	3
HCC1569	0	0	1	BaA	1	0	2
MDAMB468	0	0	0	BaA	1	0	1
MDAMB361	1	0	1	Lu	1	1	4
MDAMB157	0	0	0	BaB	0	0	3
ZR75B	1	0	0	Lu	1	1	4
MDAMB175	1	0	0	Lu	1	1	4
SUM225	0	0	1	BaA	1	0	4
SUM1315	0	0	0	BaB	0	0	3
SUM190PT	0	0	1	Lu	1	0	4
SUM159PT	0	0	0	BaB	1	0	1
SUM149PT	0	0	0	BaB	0	0	3
BT483	1	1	0	Lu	1	1	4
SUM185	0	0	0	Lu	0	0	4
SUM52	1	0	1	Lu	1	0	4
SUM44	1	0	1	NA	1	1	4
